# Supplementary material for: Dual stimuli-responsive supramolecular hydrogel of bionanoparticles and hyaluronan
Source: Royal Society of Chemistry journal article supplement (doi:10.1039/c4py00819g), 2014-08-07
Supplement: c4py00819g1.pdf [file c4py00819g1.pdf]

## Electronic supplementary information

# Dual stimuli-responsive supramolecular hydrogel of bionanoparticles and hyaluronan

Limin Chen,<sup>a</sup> Xia Zhao,<sup>a</sup> Yuan Lin,<sup>\*a</sup> Zhaohui Su<sup>a</sup> and Qian Wang<sup>ab</sup>

<sup>a</sup> State Key Laboratory of Polymer Physics and Chemistry, Changchun Institute of Applied Chemistry, Chinese Academy of Sciences, Changchun, 130022, P.R.

China. [linyuan@ciac.ac.cn](mailto:linyuan@ciac.ac.cn)

<sup>b</sup> Department of Chemistry and Biochemistry, University of South Carolina, Columbia, South Carolina 29208, USA.

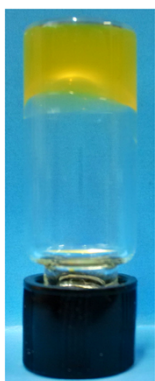

**Fig. S1** Photograph of the 0.5 wt% **M13-β-CD**/0.5 wt% **HA-Azo** hydrogel in the presence of tetraethylene glycol.

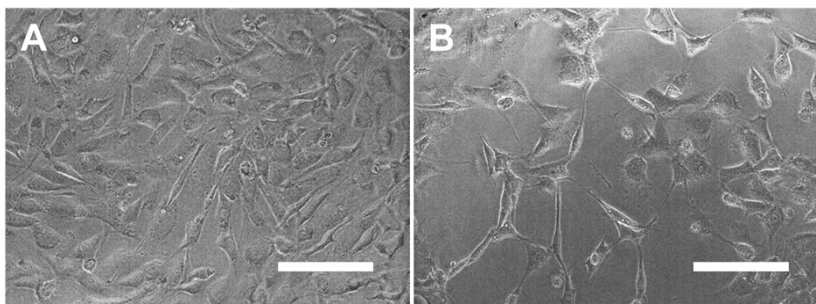

**Fig. S2** Optical images of released MC3T3-E1 cells grown on a conventional 96-well tissue culture plate after 3D culture in the 1.5 wt% **M13-β-CD**/1.5 wt% **HA-Azo** hydrogels for either 24 h (A) or 72 h (B). The scale bars represent 200 μm.
